# Supplementary material
Source: PubMed Central journal article supplement (PMC3282264)
Supplement: 97320630008098S1.pdf [file 97320630008098S1.pdf]

## Supplementary material:

Table 1: Predicted miRNAs of *R.sativus*

| New miRNAs  | EST ID    | Mature sequence        | NM | ML | LP  | Location | A+U (%) | MFEI |
|-------------|-----------|------------------------|----|----|-----|----------|---------|------|
| rsa-miR156a | 332792699 | GCUCACUGCUCUCUCUGUCAG  | 1  | 21 | 81  | 3        | 42.85   | 2.08 |
| rsa-miR156b | 332792699 | CUGACAGAAGAGAGUGAGCAC  | 2  | 21 | 81  | 5        | 47      | 2.08 |
| rsa-miR156c | 332792699 | GCUCACUGCUCUCUCUGUCAGA | 1  | 22 | 83  | 3        | 45.45   | 2.16 |
| rsa-miR156d | 332792699 | UGACAGAAGAGAGUGAGCAC   | 0  | 21 | 79  | 5        | 52      | 1.95 |
| rsa-miR156e | 332792699 | GCUCACUGCUCUCUCUGUCA   | 0  | 20 | 79  | 3        | 45      | 1.95 |
| rsa-miR156f | 332792699 | UGACAGAAGAGAGUGAGCAC   | 0  | 20 | 79  | 5        | 50      | 1.95 |
| rsa-miR156g | 332792699 | GACAGAAGAGAGUGAGCA     | 0  | 18 | 77  | 5        | 50      | 1.87 |
| rsa-miR156h | 332792699 | UGACAGAAGAGAGUGAGCA    | 1  | 19 | 79  | 5        | 52.63   | 1.95 |
| rsa-miR156i | 332792699 | GACAGAAGAGAGUGAGCAC    | 0  | 19 | 77  | 5        | 47.36   | 1.87 |
| rsa-miR160  | 158915937 | GCCUGGCUCUCCUGUAUGCCA  | 0  | 21 | 77  | 5        | 38.09   | 2.05 |
| rsa-miR160a | 158915937 | GCGUAUGAGGAGCCAAGCAU   | 1  | 21 | 83  | 3        | 47      | 2.25 |
| rsa-miR160b | 158915937 | UGCCUGGCUCUCCUGUAUGCCA | 0  | 21 | 79  | 5        | 38.09   | 2.14 |
| rsa-miR160c | 158915937 | UGCCUGGCUCUCCUGUAUGCC  | 0  | 20 | 79  | 5        | 35      | 2.14 |
| rsa-miR160d | 158915937 | UGCCUGGCUCUCCUGUAUGCCA | 1  | 22 | 79  | 5        | 40.90   | 2.14 |
| rsa-miR160e | 158915937 | GCCUGGCUCUCCUGUAUGCCA  | 0  | 20 | 77  | 5        | 35      | 2.05 |
| rsa-miR160f | 158915937 | GCCUGGCUCUCCUGUAUGCC   | 1  | 19 | 77  | 5        | 31.57   | 2.05 |
| rsa-miR162  | 167433042 | UGGAGGCAGCGGUUCAUCGAUC | 0  | 22 | 101 | 5        | 40.90   | 1.73 |
| rsa-miR162a | 167433042 | GGAGGCAGCGGUUCAUCGAUC  | 0  | 21 | 99  | 5        | 38.09   | 1.65 |
| rsa-miR162b | 167433042 | UCGAUAAAACCUUGCAUCCAGC | 0  | 22 | 105 | 3        | 50      | 2.03 |
| rsa-miR162c | 167433042 | UCGAUAAAACCUUGCAUCCA   | 0  | 20 | 101 | 3        | 55      | 1.73 |
| rsa-miR162d | 167433042 | UCGAUAAAACCUUGCAUCCAG  | 1  | 21 | 103 | 3        | 52.38   | 1.86 |
| rsa-miR162e | 167433042 | UCGAUAAAACCUUGCAUCC    | 0  | 19 | 99  | 3        | 52.63   | 1.65 |
| rsa-miR167a | 158916067 | GAUCAUGUUUGCAGUUUCACC  | 1  | 21 | 99  | 3        | 57.14   | 2.25 |
| rsa-miR167b | 158916067 | UGAAGCUGCCAGCAUGAUCUA  | 0  | 21 | 97  | 5        | 52      | 2.23 |
| rsa-miR167c | 158916067 | UGAAGCUGCCAGCAUGAUCUA  | 0  | 22 | 97  | 5        | 54      | 2.23 |
| rsa-miR167d | 158916067 | AAGCUGCCAGCAUGAUCUA    | 0  | 19 | 93  | 5        | 52.63   | 2.00 |
| rsa-miR170  | 166132096 | UAUUGGCCUGGUACACUCAGA  | 0  | 21 | 83  | 5        | 52.38   | 1.34 |
| rsa-miR171a | 166132096 | GAUUGAGCCGCGCCAAUAUC   | 0  | 20 | 87  | 3        | 45      | 1.54 |
| rsa-miR171b | 166132096 | UGAUUGAGCCGCGCCAAUAUC  | 0  | 21 | 87  | 3        | 47.61   | 1.54 |
| rsa-miR171c | 166132096 | UUGAGCCGCGCCAAUAUC     | 0  | 18 | 87  | 3        | 44.44   | 1.54 |
| rsa-miR171d | 166132096 | GAUUAUUGCCGCGCCAAUAUC  | 1  | 20 | 87  | 3        | 45      | 1.54 |
| rsa-miR171e | 166132096 | UGAUUGAGCCGCGCCAAUAUC  | 0  | 20 | 85  | 3        | 50      | 1.40 |
| rsa-miR171f | 166132096 | GAUUGAGCCGCGCCAAUAUC   | 0  | 18 | 83  | 3        | 44.44   | 1.34 |
| rsa-miR171g | 166132096 | UGAUUGAGCCGCGCCAAUAUCU | 0  | 22 | 89  | 3        | 50      | 1.60 |
| rsa-miR319a | 332773864 | UUGGACUGAAGGGAGCUCC    | 0  | 19 | 177 | 3        | 42      | 3.60 |
| rsa-miR319b | 332773864 | UUGGACUGAAGGGAGCUC     | 1  | 18 | 175 | 3        | 44.44   | 3.44 |
| rsa-miR319c | 332773864 | GGAGAUUCUUUCAGUCCA     | 0  | 18 | 177 | 5        | 55.55   | 3.60 |
| rsa-miR319d | 332773864 | UUGGACUGAAGGGAGCUCCU   | 0  | 21 | 181 | 3        | 47.61   | 3.73 |
| rsa-miR319e | 332773864 | UUUGGACUGAAGGGAGCUCU   | 0  | 21 | 179 | 3        | 47.61   | 3.68 |
| rsa-miR319f | 332773864 | UUUGGACUGAAGGGAGCUC    | 0  | 19 | 175 | 3        | 47.36   | 3.44 |
| rsa-miR319g | 332773864 | UUGGACUGAAGGGAGCUCU    | 0  | 20 | 179 | 3        | 45      | 3.68 |
| rsa-miR396a | 166139020 | UUCCACAGCUUCUUGAAC     | 1  | 19 | 122 | 5        | 57      | 1.79 |
| rsa-miR396b | 166139020 | GCUCAAGAAAGCUGUGGGAAA  | 0  | 21 | 126 | 3        | 52.38   | 1.88 |
| rsa-miR396c | 166139020 | UUCCACAGCUUCUUGAACU    | 0  | 21 | 122 | 5        | 61.90   | 1.79 |
| rsa-miR396d | 166139020 | UUCCACAGCUUCUUGAACU    | 0  | 20 | 122 | 5        | 60      | 1.79 |
| rsa-miR396e | 166139020 | UCAAGAAAGCUGUGGGAA     | 0  | 18 | 124 | 3        | 55.55   | 1.84 |
| rsa-miR396f | 166141534 | GUUCAAGAAAGCUGUGGAA    | 0  | 19 | 120 | 3        | 57.89   | 2.53 |
| rsa-miR399a | 166146391 | AAGAUCUCUAUUGGCAGG     | 0  | 18 | 89  | 5        | 55.55   | 2.08 |

NM=Number of Mismatch, ML=Length of Mature miRNAs, LP=Length of Precursor, MFEI=Minimal free energy index

Table 2: Potential targets of the identical miRNAs in *R.sativus*

| miRNAs | Targeted gene | Targeted protein                                    | Possible function                                    |
|--------|---------------|-----------------------------------------------------|------------------------------------------------------|
| miR156 | EY930450      | squamosa promoter-binding protein                   | transcription factor                                 |
|        | EW715846      | squamosa promoter-binding protein                   | transcription factor                                 |
|        | EX898839      | squamosa promoter-binding protein                   | transcription factor                                 |
|        | FD950281      | SMC (structural maintenance of chromosomes) protein | organizing and segregating chromosomes for partition |
| miR167 | FY434046      | DNA binding protein                                 | Transcription Factor                                 |
|        | DN910345      | DNA binding protein                                 | Transcription Factor                                 |
|        | DY64102       | DNA binding protein                                 | Transcription Factor                                 |
| miR396 | EW713403      | Thioredoxin super family                            | Transcription factor                                 |
|        | EW713404      | Thioredoxin super family                            | Transcription factor                                 |
|        | EW718331      | Thioredoxin super family                            | Transcription factor                                 |
|        | EW718591      | Thioredoxin super family                            | Transcription factor                                 |
|        | EW733484      | Thioredoxin super family                            | Transcription factor                                 |
|        | FD563793      | Thioredoxin super family                            | Transcription factor                                 |
|        | FD941766      | Thioredoxin super family                            | Transcription factor                                 |
|        | FD939455      | Thioredoxin super family                            | Transcription factor                                 |
|        | FY442946      | Thioredoxin super family                            | Transcription factor                                 |
